# Supplementary material for: Comparative gene expression analysis of Beauveria bassiana against Spodoptera frugiperda
Source: PeerJ. 2025 Jun 30;13:e19591. doi: 10.7717/peerj.19591 (PMC12225636; doi:10.7717/peerj.19591)
Supplement: Supplemental Information 3 [file peerj-13-19591-s003.xlsx]

## Sheet: Raw data
Conc. (spore/mL)		Larval mortality (%)			Conc. (spore/mL)			Pupal mortality (%)				Conc. (spore/mL)		Individuals failed to develop to adults (observed) (%)
Control		6.66	6.66		Control			0				Control		6.66
Control		13.33	13.33		Control			0				Control		13.33
Control		6.66	6.66		Control			0				Control		6.66
Mean		8.88333			Mean			0				Mean		8.88333
SE		0.994305			SE			0				SE		0.994305
10000		13.33	13.33		10000			23.07	23.07			10000		36.4
10000		20	20		10000			33.33	33.33			10000		53.3
10000		26.66	26.66		10000			18.18	18.18			10000		44.84
Mean		19.9967			Mean			24.86				Mean		44.8467
SE		1.7209			SE			1.99639				SE		2.18178
100000		20	20		100000			18.18	18.18			100000		38.18
100000		40	40		100000			22.22	22.22			100000		62.22
100000		33.33	33.33		100000			33.33	33.33			100000		66.66
Mean		31.11			Mean			24.5767				Mean		55.6867
SE		2.62927			SE			2.0256				SE		3.95635
1000000		60	60		1000000			25	25			1000000		85
1000000		66.66	66.66		1000000			22.22	22.22			1000000		88.88
1000000		60	60		1000000			33.33	33.33			1000000		93.33
Mean		62.22			Mean			26.85				Mean		89.07
SE		0.992814			SE			1.49276				SE		1.07624
10000000		66.66	66.66		10000000			40	40			10000000		100
10000000		73.33	73.33		10000000			25	25			10000000		98.33
10000000		60	60		10000000			33.33	33.33			10000000		99.99
Mean		66.6633			Mean			32.7767				Mean		99.44
SE		1.7209			SE			1.94044				SE		0.248207
Conc. (spore/mL)		Individuals failed to develop to adults (corrected) (%)										Conc. (spore/mL)		Larval duration			Conc. (spore/mL)		Pupation (%)
Control		0										Control		9.6	9.6		Control		93.34	93.34
Control		0										Control		10.2	10.2		Control		86.67	86.67
Control		0										Control		10.3	10.3		Control		93.34	93.34
Mean		0										Mean		10.0333			Mean		91.1167
SE		0										SE		0.0977525			SE		0.994305
10000		35.71										10000		13	13		10000		86.67	86.67
10000		46.15										10000		12.33	12.33		10000		80	80
10000		42.85										10000		12.66	12.66		10000		73.34	73.34
Mean		41.57										Mean		12.99			Mean		80.0033
SE		1.37785										SE		0.0864998			SE		1.7209
100000		35.71										100000		14.25	14.25		100000		80	80
100000		57.14										100000		12.33	12.33		100000		60	60
100000		64.66										100000		14.6	14.6		100000		66.66	66.66
Mean		52.5033										Mean		13.86			Mean		68.8867
SE		3.87857										SE		0.315556			SE		2.62956
1000000		85.71										1000000		11.6	11.6		1000000		40	40
1000000		84.61										1000000		13.8	13.8		1000000		33.34	33.34
1000000		92.85										1000000		16.2	16.2		1000000		40	40
Mean		87.7233										Mean		14.39			Mean		37.78
SE		1.15512										SE		0.594045			SE		0.992814
10000000		100										10000000		14	14		10000000		33.34	33.34
10000000		92.3										10000000		14.6	14.6		10000000		26.67	26.67
10000000		92.85										10000000		16	16		10000000		40	40
Mean		95.05										Mean		14.86			Mean		33.3367
SE		1.10913										SE		0.264995			SE		1.7209
Conc. (spore/mL)		Pupal duration					Conc. (spore/mL)		Adult emergence (%)				Conc. (spore/mL)		Adult longevity
Control		10	10				Control		93.4	93.4			Control		9.3	9.3
Control		9	9				Control		86.67	86.67			Control		11.2	11.2
Control		9	9				Control		93.34	93.34			Control		10.3	10.3
Mean		9.33333					Mean		91.1367				Mean		10.2667
SE		0.149071					SE		0.998807				SE		0.245402
10000		8	8				10000		63.6	63.6			10000		1	1
10000		11	11				10000		46.7	46.7			10000		3	3
10000		10	10				10000		55.16	55.16			10000		2	2
Mean		9.66667					Mean		55.1533				Mean		2
SE		0.394405					SE		2.18178				SE		0.258199
100000		11	11				100000		61.82	61.82			100000		2	2
100000		10	10				100000		37.78	37.78			100000		1	1
100000		12	12				100000		33.34	33.34			100000		2	2
Mean		11					Mean		44.3133				Mean		1.66667
SE		0.258199					SE		3.95635				SE		0.149071
1000000		13	13				1000000		15	15			1000000		1	1
1000000		12	12				1000000		11.12	11.12			1000000		1	1
1000000		10	10				1000000		6.67	6.67			1000000		2	2
Mean		11.6667					Mean		10.93				Mean		1.33333
SE		0.394405					SE		1.07624				SE		0.149071
10000000		14	14				10000000		0	0			10000000		1	1
10000000		14	14				10000000		1.67	1.67			10000000		1	1
10000000		15	15				10000000		0.01	0.01			10000000		2	2
Mean		14.3333					Mean		0.56				Mean		1.33333
SE		0.149071					SE		0.144591	0			SE		0.149071
Conc. (spore/mL)		Sex ratio (Female/total)							Conc. (spore/mL)		No. of egg/female (Fecundity)				Conc. (spore/mL)		Deficient fecundity (%)
Control		0.42	0.42						Control		350	350			Control		0
Control		0.3	0.3						Control		380	380			Control		0
Control		0.69	0.69						Control		400	400			Control		0
Mean		0.47							Mean		376.667	376.667			Mean		0
SE		0.121353	0						SE		6.49786				SE		0
10000		0.33	0.33						10000		58	58			10000		83.42	83.42
10000		0.57	0.57						10000		80	80			10000		78.94	78.94
10000		0.44	0.44						10000		70	70			10000		82.5	82.5
Mean		0.446667	4.575						Mean		69.3333				Mean		81.62
SE		0.0310197							SE		2.8441				SE		0.610923
100000		0.33	0.33						100000		40	40			100000		88.57	88.57
100000		0.5	0.5						100000		26	26			100000		93.15	93.15
100000		0.6	0.6						100000		30	30			100000		82.5	82.5
Mean		0.476667							Mean		32				Mean		88.0733
SE		0.0352452							SE		1.8619				SE		1.37939
1000000		0.33	0.33						1000000		0				1000000		100
1000000		0.69	0.69						1000000		0				1000000		100
1000000		0.6	0.6						1000000		0				1000000		100
Mean		0.54							Mean		0				Mean		0
SE		0.0483735							SE		0				SE		0
10000000		1	1						10000000		0				10000000		100
10000000		2	2						10000000		0				10000000		100
10000000		1	1						10000000		0				10000000		100
Mean		1.33333							Mean		0				Mean		0
SE		0.149071							SE		0				SE		0
Conc. (spore/mL)		Oviposition deterrent index (%)
Control		0
Control		0
Control		0
Mean		0
SE		0
10000		71.56	71.56
10000		65.21	65.21
10000		70.21	70.21
Mean		68.9933
SE		0.863745
100000		79.48	79.48
100000		86.17	86.17
100000		86.04	86.04
Mean		83.8967
SE		0.987739
1000000		100
1000000		100
1000000		100
Mean		100
SE		0
10000000		100
10000000		100
10000000		100
Mean		100
SE		0
				ANOVA
								Sum of Squares	df	Mean Square	F	Sig.
				Larval duration		Between Groups		44.131	4	11.033	8.313	0.003
						Within Groups		13.272	10	1.327
						Total		57.403	14
				Larval mortality		Between Groups		7881.94	4	1970.48	44.349	0
						Within Groups		444.311	10	44.431
						Total		8326.25	14
				Pupation		Between Groups		7881.81	4	1970.45	44.344	0
						Within Groups		444.356	10	44.436
						Total		8326.16	14
				Pupal duration		Between Groups		47.733	4	11.933	9.421	0.002
						Within Groups		12.667	10	1.267
				Pupal mortality		Total		60.4	14
						Between Groups		1914.91	4	478.727	11.332	0.001
						Within Groups		422.469	10	42.247
				Adult longevity		Total		2337.38	14
						Between Groups		181.877	4	45.469	78.305	0
						Within Groups		5.807	10	0.581
						Total		187.684	14
				Adult emergence		Between Groups		15788.7	4	3947.17	58.14	0
						Within Groups		678.912	10	67.891
						Total		16467.6	14
				Sex ratio (Female/total)		Between Groups		1.748	4	0.437	4.951	0.018
						Within Groups		0.883	10	0.088
						Total		2.631	14
				No. of egg/female (Fecundity)		Between Groups		306036	4	76509.1	474.23	0
						Within Groups		1613.33	10	161.333
						Total		307650	14
				Individuals failed to develop to adults (observed) (%)		Between Groups		15782.6	4	3945.65	58.14	0
						Within Groups		678.643	10	67.864
						Total		16461.2	14
				Individuals failed to develop to adults (corrected) (%)		Between Groups		17657.2	4	4414.3	75.434	0
						Within Groups		585.188	10	58.519
						Total		18242.4	14
				Deficient fecundity (%)		Between Groups		21252.3	4	5313.08	778.153	0
						Within Groups		68.278	10	6.828
						Total		21320.6	14
				Oviposition deterrent index (%)		Between Groups		20677.4	4	5169.35	1001	0
						Within Groups		51.651	10	5.165
						Total		20729	14
					Post Hoc Tests
					Homogeneous Subsets
					Larval duration
					Duncan
				Concentration			N	Subset for alpha = 0.05
								1	2
				control			3	10.0333
				A			3		12.9967
				C			3		13.8667
				B			3		14.3933
				D			3		14.8667
				Sig.				1	0.093
					Means for groups in homogeneous subsets are displayed.
					Larval mortality
					Duncan
				Concentration			N	Subset for alpha = 0.05
								1	2	3
				control			3	8.8833
				A			3	19.9967	19.9967
				B			3		31.11
				C			3			62.22
				D			3			66.6633
				Sig.				0.068	0.068	0.433
					Means for groups in homogeneous subsets are displayed.
					Pupation
					Duncan
				Concentration			N	Subset for alpha = 0.05
								1	2	3
				D			3	33.3367
				C			3	37.78
				B			3		68.8867
				A			3		80.0033	80.0033
				control			3			91.1167
				Sig.				0.433	0.068	0.068
					Means for groups in homogeneous subsets are displayed.
					Pupal duration
					Duncan
				Concentration			N	Subset for alpha = 0.05
								1	2	3
				control			3	9.3333
				A			3	9.6667	9.6667
				B			3	11	11
				C			3		11.6667
				D			3			14.3333
				Sig.				0.114	0.064	1
					Means for groups in homogeneous subsets are displayed.
					Pupal mortality
					Duncan
				Concentration			N	Subset for alpha = 0.05
								1	2
				control			3	0
				B			3		24.5767
				A			3		24.86
				C			3		26.85
				D			3		32.7767
				Sig.				1	0.18
					Means for groups in homogeneous subsets are displayed.
					Adult longevity
					Duncan
				Concentration			N	Subset for alpha = 0.05
								1	2
				C			3	1.3333
				D			3	1.3333
				B			3	1.6667
				A			3	2
				control			3		10.2667
				Sig.				0.341	1
					Means for groups in homogeneous subsets are displayed.
					Adult emergence
					Duncan
				Concentration			N	Subset for alpha = 0.05
								1	2	3
				D			3	0.56
				C			3	10.93
				B			3		44.3133
				A			3		55.1533
				control			3			91.1367
				Sig.				0.154	0.138	1
					Means for groups in homogeneous subsets are displayed.
					Sex ratio (Female/total)
					Duncan
				Concentration			N	Subset for alpha = 0.05
								1	2
				A			3	0.4467
				control			3	0.47
				B			3	0.4767
				C			3	0.54
				D			3		1.3333
				Sig.				0.727	1
					Means for groups in homogeneous subsets are displayed.
					No. of egg/female (Fecundity)
					Duncan
				Concentration			N	Subset for alpha = 0.05
								1	2	3	4
				C			3	0
				D			3	0
				B			3		32
				A			3			69.3333
				control			3				376.67
				Sig.				1	1	1	1
					Means for groups in homogeneous subsets are displayed.
					Individuals failed to develop to adults (observed) (%)
					Duncan
				Concentration			N	Subset for alpha = 0.05
								1	2	3
				control			3	8.8833
				A			3		44.8467
				B			3		55.6867
				C			3			89.07
				D			3			99.44
				Sig.				1	0.138	0.154
					Means for groups in homogeneous subsets are displayed.
					Individuals failed to develop to adults (corrected) (%)
					Duncan
				Concentration			N	Subset for alpha = 0.05
								1	2	3
				control			3	0
				A			3		41.57
				B			3		52.5033
				C			3			87.7233
				D			3			95.05
				Sig.				1	0.111	0.268
					Means for groups in homogeneous subsets are displayed.
					Deficient fecundity (%)
					Duncan
				Concentration			N	Subset for alpha = 0.05
								1	2	3	4
				control			3	0
				A			3		81.62
				B			3			88.0733
				C			3				100
				D			3				100
				Sig.				1	1	1	1
					Means for groups in homogeneous subsets are displayed.
					Oviposition deterrent index (%)
					Duncan
				Concentration			N	Subset for alpha = 0.05
								1	2	3	4
				control			3	0
				A			3		68.9933
				B			3			83.8967
				C			3				100
				D			3				100
				Sig.				1	1	1	1
					Means for groups in homogeneous subsets are displayed.
