# Supplementary material for: Comparative gene expression analysis of Beauveria bassiana against Spodoptera frugiperda
Source: PeerJ. 2025 Jun 30;13:e19591. doi: 10.7717/peerj.19591 (PMC12225636; doi:10.7717/peerj.19591)
Supplement: Supplemental Information 4 [file peerj-13-19591-s004.xlsx]

## Sheet: heatmap hamdy
			Original data
CON.	Larval duration		Larval mortality			Pupation	Pupal duration		Pupal mortality		Adult longevity		Adult emergence		Sex ratio		Fecundity
units	days		(%)			(%)	days		(%)		days		(%)		(Female/total)		egg
control	10.03	10.03	8.88			91.11	9.33		0		10.26		91.13		0.47		376.66
10000	12.66	12.66	19.99			80	9.66		24.86		2		55.15		0.44		69.33
100000	13.72	13.72	31.11			68.88	11		24.57		1.66		44.31		0.47		32
1000000	13.86	13.86	62.22			37.78	11.66		26.85		1.33		10.93		0.54		0
10000000	14.86	14.86	66.66			33.33	14.33		32.77		1.33		0.56		1.33		0
								Pearson Correlations
		Larval duration		Larval mortality		Pupation		Pupal duration		Pupal mortality		Adult longevity		Adult emergence		Sex ratio		Fecundity
Pearson Correlations		Pearson Correlations		Pearson Correlations		Pearson Correlations		Pearson Correlations		Pearson Correlations		Pearson Correlations		Pearson Correlations		Pearson Correlations		Pearson Correlations
Larval duration		1		0.85		-0.85		0.82		0.97		-0.93		-0.94		0.58		-0.96
Larval mortality		0.85		1		-1		0.9		0.77		-0.68		-0.97		0.69		-0.75
Pupation		-0.85		-1		1		-0.9		-0.77		0.68		0.98		-0.69		0.75
Pupal duration		0.82		0.9		-0.9		1		0.72		-0.57		-0.89		0.91		-0.64
Pupal mortality		0.97		0.77		-0.77		0.72		1		-0.98		-0.89		0.5		-0.98
Adult longevity		-0.93		-0.68		0.68		-0.57		-0.98		1		0.82		-0.3		0.99
Adult emergence		-0.94		-0.97		0.98		-0.89		-0.89		0.82		1		-0.66		0.87
Sex ratio		0.58		0.69		-0.69		0.91		0.5		-0.3		-0.66		1		-0.36
Fecundity		-0.96		-0.75		0.75		-0.64		-0.98		0.99		0.87		-0.36		1
