# Supplementary material for: Comparative gene expression analysis of Beauveria bassiana against Spodoptera frugiperda
Source: PeerJ. 2025 Jun 30;13:e19591. doi: 10.7717/peerj.19591 (PMC12225636; doi:10.7717/peerj.19591)
Supplement: Supplemental Information 5 [file peerj-13-19591-s005.xlsx]

## Sheet: Sheet1
							Larval moratity
		Time	BbI -R1	BbI-R2	BbI-R3	Mean	SE	Water-R1	Water-R2	Water-R3	Mean	SE
		0	0	0	0	0	0	0	0	0	0	0
		24	8	3	1	4	0.93	0	0	0	0	0
		48	15	5	5	8.33	1.49	0	0	0	0	0
		72	57	29	46	44	3.64	10	9	0	3.33	1.27
		96	66	37	57	53.33	3.8	11	1	0	4	1.57
		120	75	70	48	64.33	4	11	1	0	4	1.57
		144	82	75	52	69.66	4.05243	12	1	0	4.33	1.7
		168	83	80	59	74	3.37	14	1	0	5	2
		192	90	85	74	83	2.11	14	1	0	5	2
