# Supplementary material for: Comparative gene expression analysis of Beauveria bassiana against Spodoptera frugiperda
Source: PeerJ. 2025 Jun 30;13:e19591. doi: 10.7717/peerj.19591 (PMC12225636; doi:10.7717/peerj.19591)
Supplement: Supplemental Information 6 [file peerj-13-19591-s006.xlsx]

## Sheet: Sheet1
RT-qPCR
Gene	R1	R2	R3	Mean	SE					RNA-seq
STL1	1.94	2.53	1.8	2.09	0.1					Genes	Fold change (Log2)
MFS2	1.4	3	1	1.8	0.27					STL1	5.43
chi2	1.01	0.7	1.5	1.07	0.1					MFS2	5.95
k0381	3.9	1.15	1.2	2.08	0.4					chi2	2.84
MGG-80	0.98	0.27	0.26	0.5	0.1					k0381	4.26
CTF1-Beta	-1	-1.05	-1.2	-1.08	0.026					MGG-80	2
SLD1	-0.98	-1.05	-1.1	-1.04	0.015					CTF1-Beta	-1.05
oca3	-1.9	-2.3	-2.1	-2.1	0.05					SLD1	-1.01
RV15533	-3.5	-3.8	-3.2	-3.2	0.07					oca3	-1.57
K13524	-1.1	-1.25	-1	-1.11	0.032					RV15533	-2.42
										K13524	-1.06
